# Supplementary material for: ω-3 polyunsaturated fatty acids ameliorate type 1 diabetes and autoimmunity
Source: JCI journal article supplement (doi:10.1172/jci87388), 2017-04-04
Supplement: sd1 [file 1]

## **Title: Reversal of type 1 diabetes through therapeutic elevation of $\omega$ -3 PUFAs**

**Authors:** Xinyun Bi<sup>1,4</sup>, Fanghong Li<sup>1</sup>, Shanshan Liu<sup>2</sup>, Yan Jin<sup>3</sup>, Xin Zhang<sup>2</sup>, Tao Yang<sup>5</sup>, Yifan Dai<sup>2</sup>, Xiaoxi Li<sup>2\*</sup>, Allan Zijian Zhao<sup>1\*</sup>

<sup>1</sup>Collaborative Innovation Center for Cancer Medicine, Institute of Biomedical and Pharmaceutical Sciences, Guangdong University of Technology, Guangzhou, Guangdong Province, China; <sup>2</sup>The Center of Metabolic Disease Research, Nanjing Medical University, Nanjing, Jiangsu Province, China; <sup>3</sup>Department of Pathology, Wuxi Maternity and Child Health Care Hospital Affiliated to Nanjing Medical University, Wuxi, Jiangsu Province, China. <sup>4</sup>The Center of Immunological Genetics and HLA Typing and <sup>5</sup>Department of Endocrinology, First Affiliated Hospital of Nanjing Medical University, Nanjing, Jiangsu Province, China.

### **Affiliations:**

\*Address all correspondence and requests for reprints to: Allan Zijian Zhao, Ph.D, Institute of Biomedical and Pharmaceutical Sciences, Guangdong University of Technology, Guangzhou, Guangdong Province; or Xiaoxi Li, Ph.D., The Center of Metabolic Disease Research, Nanjing Medical University, Nanjing, Jiangsu Province, China; E-mail: [azzhao@gdut.edu.cn](mailto:azzhao@gdut.edu.cn); or [lxx@njmu.edu.cn](mailto:lxx@njmu.edu.cn)

## **Supplemental Materials**

Supplemental Figure 1. Representative hematoxylin/eosin images of four categories based on the relative degree of islets immune infiltration, related to Figure 1B and 6D.

Supplemental Figure 2. The ratio of Th1/Th2 cells was polarized towards Th1 in diabetic NOD mice.

Supplemental Figure 3. Modulation of Th cells by  $\omega$ -3 and  $\omega$ -6 PUFAs in vivo, related to Figure 2.

Supplemental Figure 4. Modulation of CD8<sup>+</sup> T-cells by  $\omega$ -3 and  $\omega$ -6 PUFAs in vivo, related to Figure 2.

Supplemental Figure 5.  $\omega$ -3 and  $\omega$ -6 PUFAs changed Th cells polarization in cultured splenocytes, related to Figure 2.

Supplemental Figure 6. AA-derived epoxyeicosatrienoic acids (EETs) increased in pancreas of AA-fed NOD mice, related to Figure 3.

Supplemental Figure 7.  $\omega$ -3 PUFAs regulates the differentiation of Th cells through its diverse metabolic production, related to Figure 3.

Supplemental Figure 8. Therapeutic  $\omega$ -3 PUFAs improved Th cell differentiation in diabetic NOD mice, related to Figure 9.

Supplemental Figure 9.  $\omega$ -3 and  $\omega$ -6 PUFAs changed Th cells polarization of PBMCs from T1D patients *in vitro*, related to Figure 10.

Supplemental Figure 10. Modulation of Th cells by  $\omega$ -3 and  $\omega$ -6 PUFAs in PBMCs from non-diabetic donors *in vitro*, related to Figure 10.

Supplemental Figure 11. Expression of transcription factors of Th cells modulated by  $\omega$ -3 and  $\omega$ -6 PUFAs in PBMCs from non-diabetic donors *in vitro*.

Supplemental Table 1. Distribution of  $\omega$ -3 and  $\omega$ -6 PUFA Species in Diets.

Supplemental Table 2. Analysis of  $\omega$ -3 and  $\omega$ -6 PUFA Species in the Blood Samples of NOD mice with Dietary Intervention.

Supplemental Table 3. Analysis of  $\omega$ -3 and  $\omega$ -6 PUFA Species in the Tail Samples of NOD mice with Dietary Intervention.

Supplemental Table 4. Analysis of cytokines secretion in blood serum of non-diabetic NOD mice with Dietary Intervention.

Supplemental Table 5. Analysis of cytokines induced in NOD splenocytes activated with DHA , EPA and AA in serum-containing medium.

Supplemental Table 6. Analysis of  $\omega$ -3 and  $\omega$ -6 PUFA Species in the Whole Blood Samples of Diabetic NOD Mice in  $\omega$ -3 PUFAs Treatment.

Supplemental Table 7. Characterization of T1D patients and non-diabetic donors.

Supplemental Table 8. Distribution of Fatty Acid Species in Fish Oil and DHA+EPA Diets.

Supplemental Table 9. Compositions of Natural-Ingredient Diet used for SPF Mouse Breeding Colonies.

Supplemental Table 10. Real-time RT-PCR primers used for mRNA expression analysis.

## Supplemental Figure 1

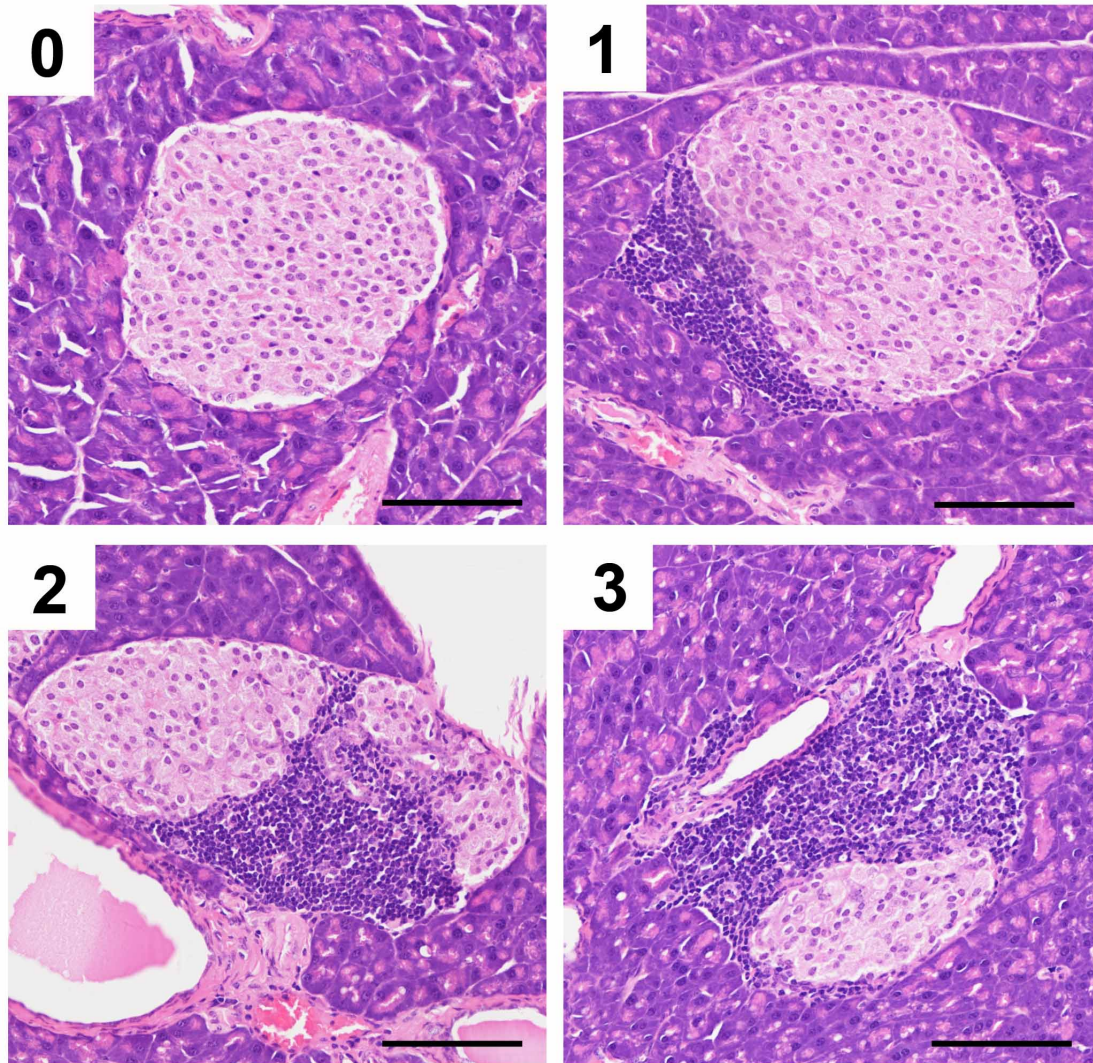

**Supplemental Figure 1.  $\omega$ -3 PUFAs blocked the progression of immune infiltration in NOD mice, related to Figure 1A and 6D.** Representative hematoxylin/eosin images of four categories based on the relative degree of islets immune infiltration. Islets were characterized by the relative degree of leukocyte infiltration in non-diabetic mice. The graph showed the fraction of islets with no insulitis(0), periinsulitis, in which leukocytes remained largely in the periphery of the islet(1),invasive insulitis, corresponding to 25–50% coverage of the islet(2), and severe insulitis, in which greater than 50% of the islet was covered with infiltrate(3). Scale bars = 100  $\mu$ m.

## Supplemental Figure 2

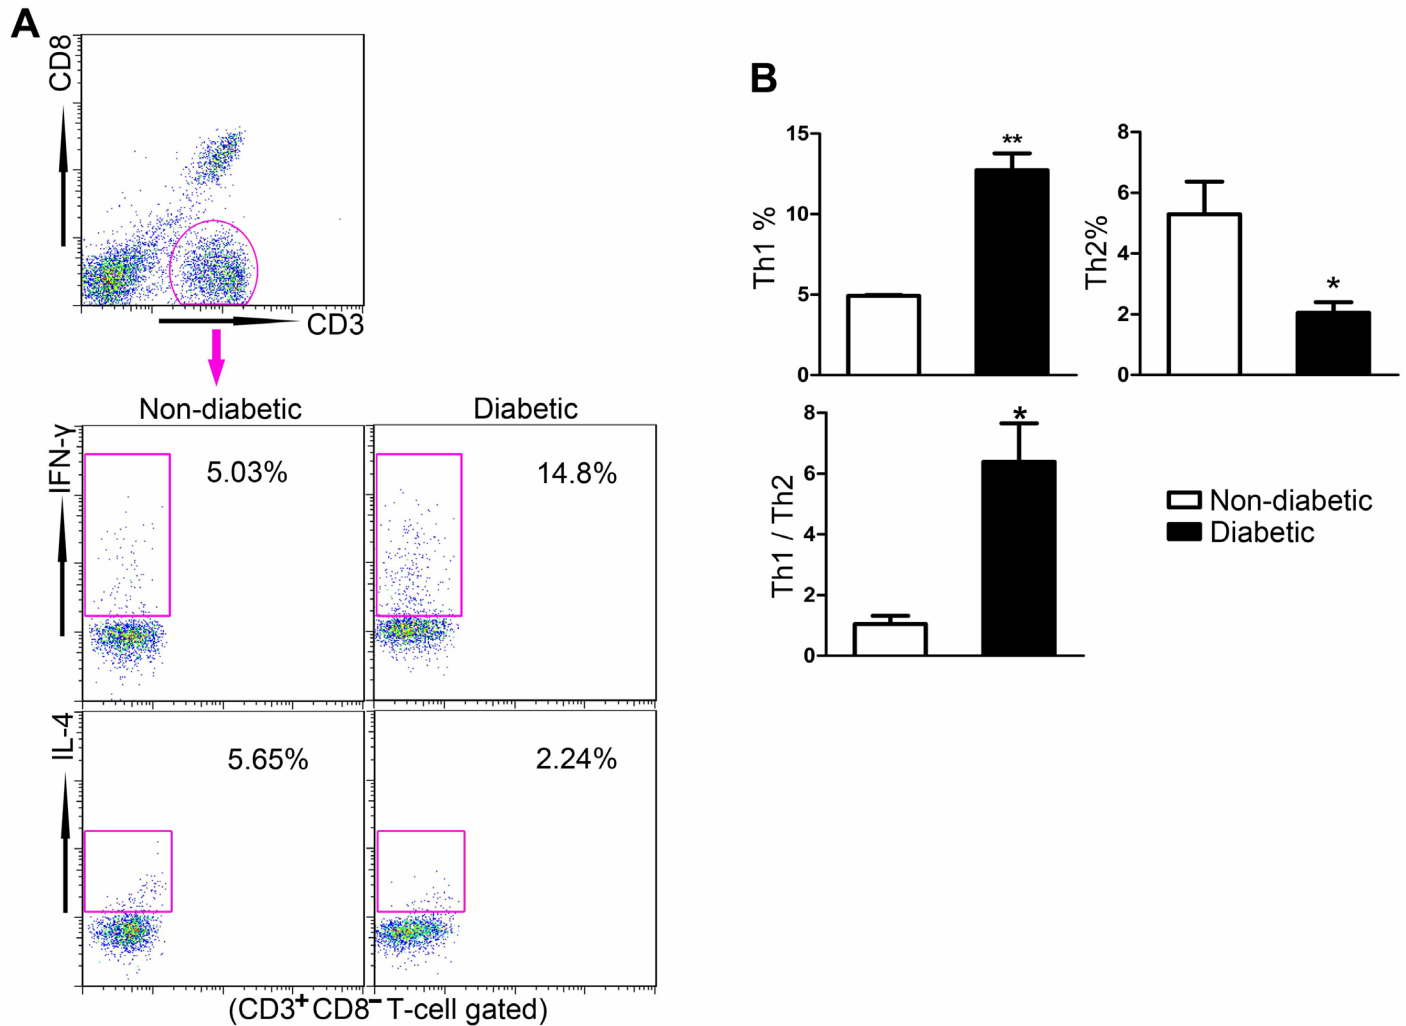

**Supplemental Figure 2. The ratio of Th1/Th2 cells was polarized towards Th1 in diabetic NOD mice.** IFN- $\gamma$ <sup>+</sup> and IL-4<sup>+</sup> of Th cells in spleen of non-diabetic and diabetic NOD mice. (A) Representative flow cytometry images with numbers in quadrants indicating percent IFN- $\gamma$ <sup>+</sup> and IL-4<sup>+</sup> of Th cells (top right) and (B-D) quantification of n = 3 per group. Data shown are gated on CD4<sup>+</sup> T-cells (CD3<sup>+</sup>CD8<sup>-</sup>). \*, P < 0.05; \*\*, P < 0.01 when compared with non-diabetic group. Values are means  $\pm$  SEM (Student *t* tests).

### Supplemental Figure 3

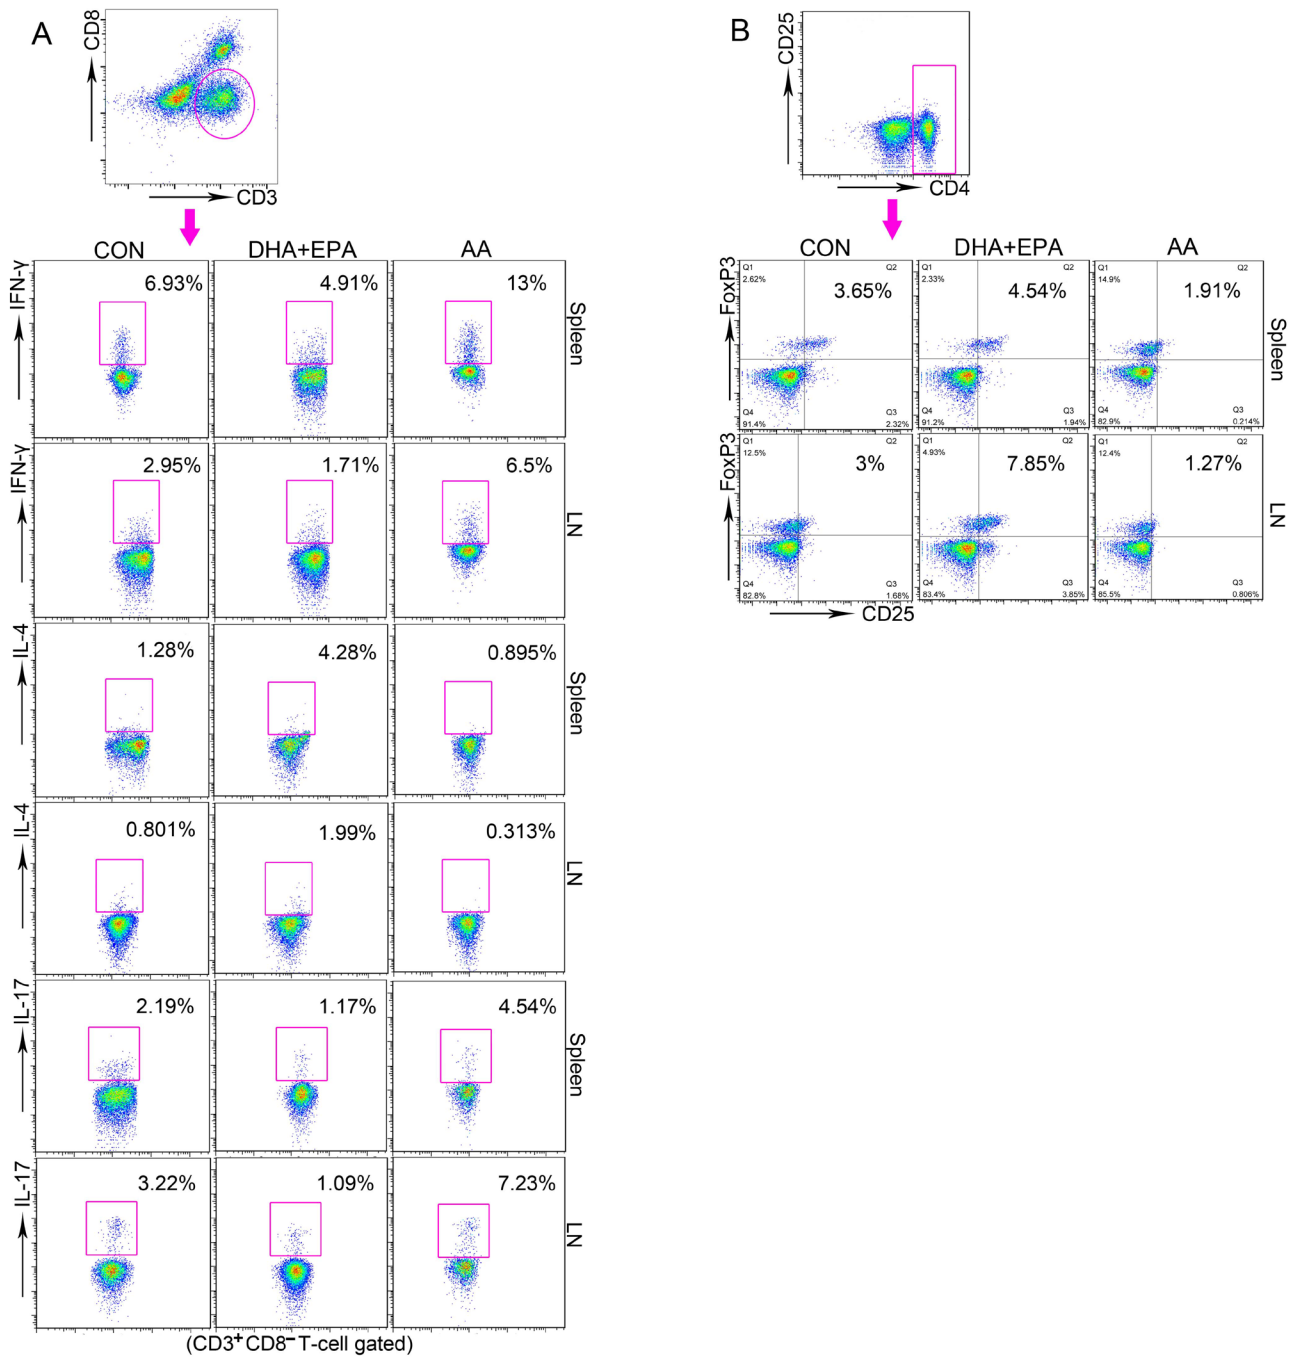

**Supplemental Figure 3. Modulation of Th cells by  $\omega$ -3 and  $\omega$ -6 PUFAs *in vivo*, related to Figure 2.** Percentage of Th1, Th2, Th17 and Treg cells in spleen and lymph node(LN) of non-diabetic NOD mice fed on control, DHA+EPA and AA diets. Spleen and lymph node were harvested when NOD mice were sacrificed at 20 weeks following dietary intervention(n = 6-8 per group). Representative flow cytometry images with numbers in quadrants indicating percent IFN- $\gamma$ <sup>+</sup>, IL-4<sup>+</sup>, IL-7<sup>+</sup> and CD25<sup>+</sup> FoxP3<sup>+</sup> of Th cells (top right). Data shown are gated on CD4<sup>+</sup> T-cells(CD3<sup>+</sup>CD8<sup>-</sup>).

## Supplemental Figure 4

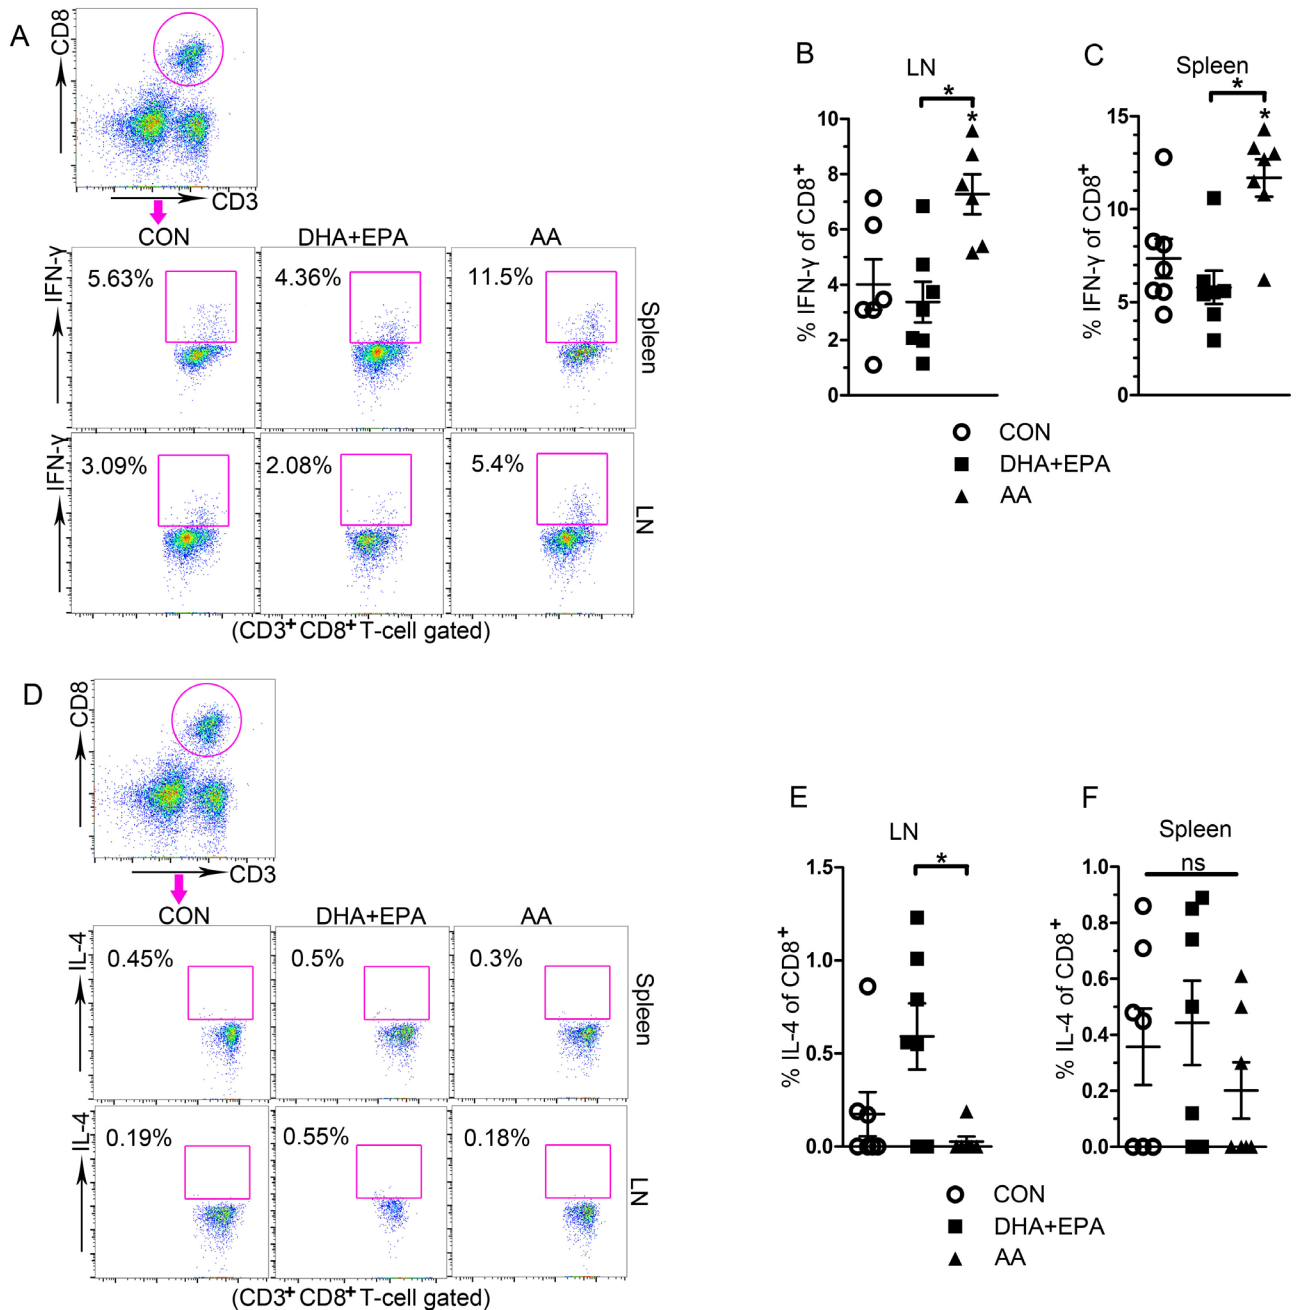

**Supplemental Figure 4. Modulation of CD8<sup>+</sup> T-cells by  $\omega$ -3 and  $\omega$ -6 PUFAs *in vivo*, related to Figure 2.** IFN- $\gamma$ <sup>+</sup> and IL-4<sup>+</sup> of CD8<sup>+</sup> T-cells percentage in spleen and lymph node(LN) of non-diabetic NOD mice fed on control, DHA+EPA and AA diets. Spleen and lymph node were harvested when NOD mice were sacrificed at 20 weeks following dietary intervention. Representative flow cytometry images with numbers in quadrants indicating percent IFN- $\gamma$ <sup>+</sup>(A) and IL-4<sup>+</sup>(D) of CD8<sup>+</sup> T-cells (top right) and quantification(B-C and E-F) of n = 6-7 per group. Data shown are gated on CD8<sup>+</sup> T-cells. \*, P < 0.05 when compared with control group. Values are means  $\pm$  SEM(Student *t* tests).

## Supplemental Figure 5

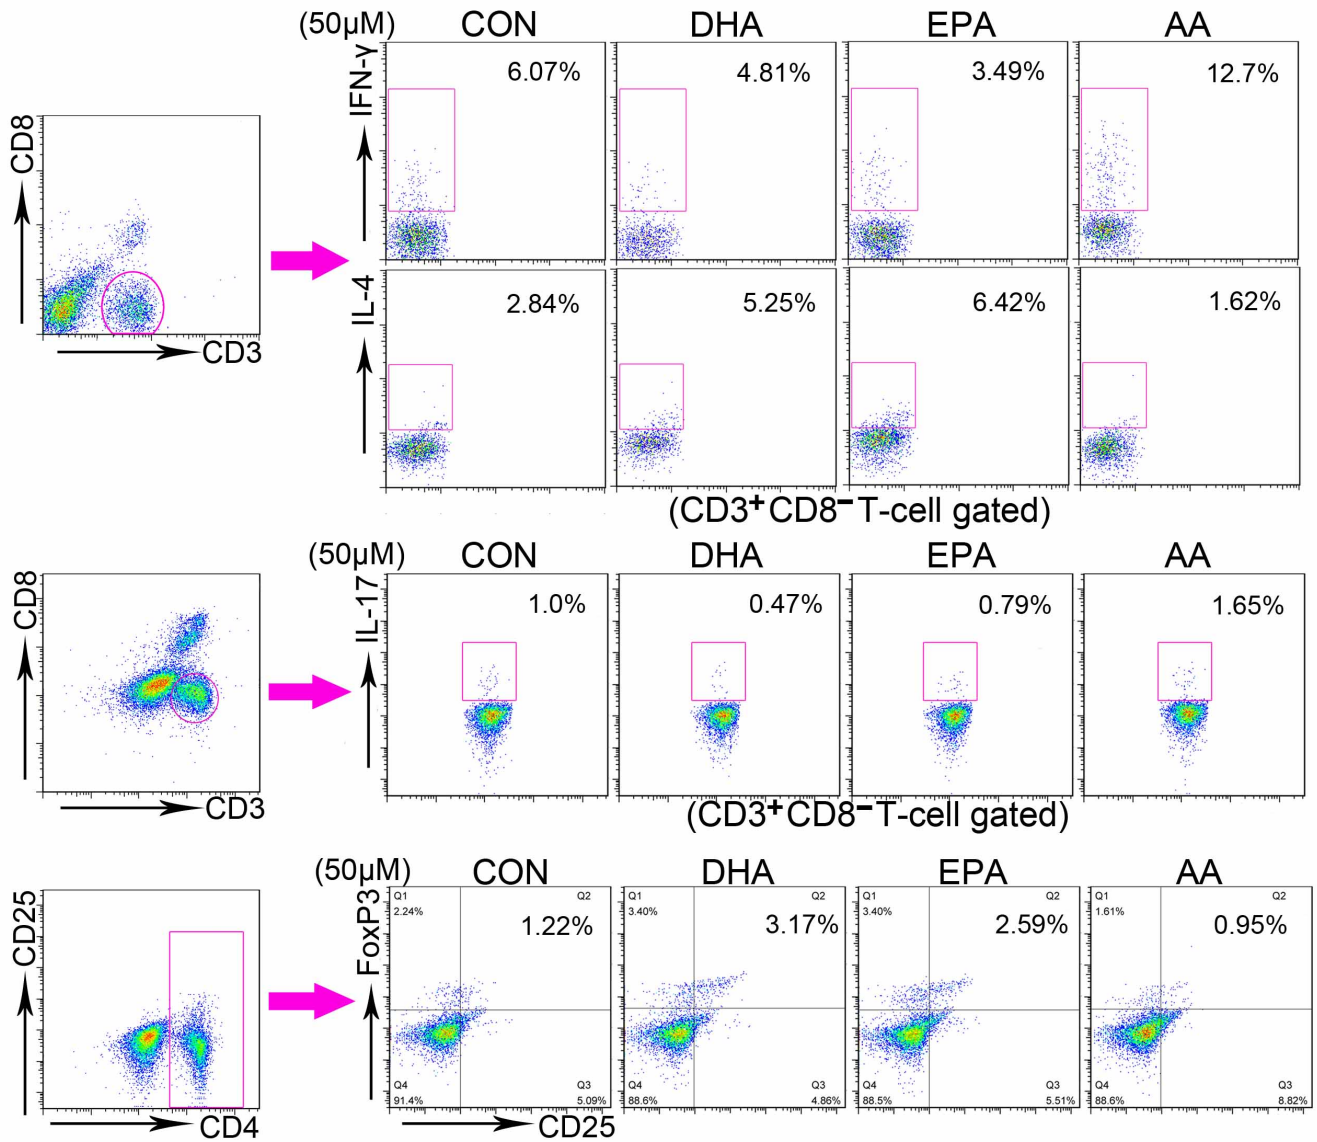

**Supplemental Figure 5.  $\omega$ -3 and  $\omega$ -6 PUFAs changed Th cells polarization in cultured splenocytes, related to Figure 2.** Intracellular staining of Th1, Th2, Th17 and Treg cells of 10-wk-old non-diabetic NOD mice cultured under PMA and ionomycin stimulation in the presence of DHA, EPA and AA(50 $\mu$ M) added at the time of activation for 24 h. Representative flow cytometry images with numbers in quadrants indicating percent IFN- $\gamma$ <sup>+</sup>, IL-4<sup>+</sup>, IL-7<sup>+</sup> and CD25<sup>+</sup> FoxP3<sup>+</sup> of Th cells (top right). Data shown are gated on CD4<sup>+</sup> T-cells(CD3<sup>+</sup>CD8<sup>-</sup>).



## Supplemental Figure 6

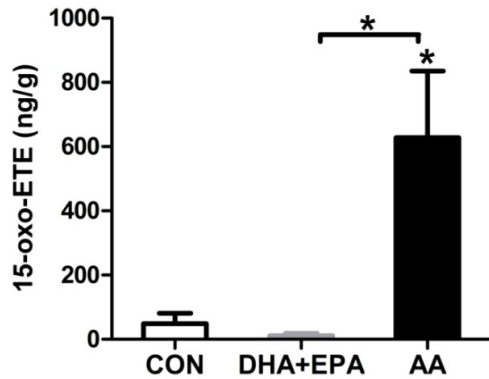

**Supplemental Figure 6. AA-derived epoxyeicosatrienoic acids (EETs) increased in pancreas of AA-fed NOD mice, related to Figure 3.** Presence of eicosanoids from  $\omega$ -3 or  $\omega$ -6 PUFAs in pancreas samples of NOD mice fed on control, DHA+EPA and AA diets (n = 6). \*, P < 0.05 when compared to control group. Values are means  $\pm$  SEM (Student *t* tests).

## Supplemental Figure 7

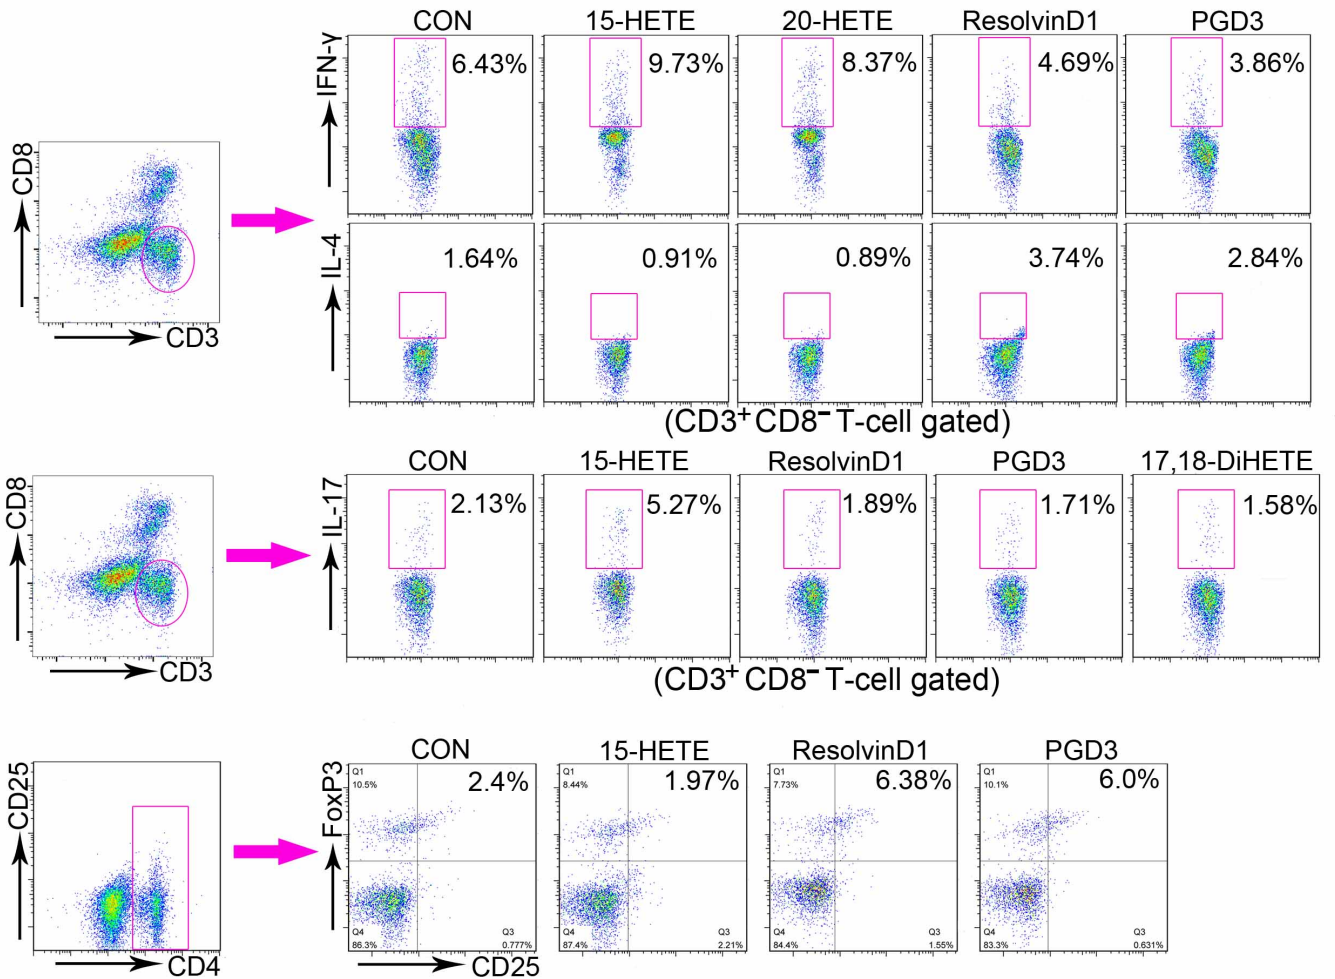

**Supplemental Figure 7.  $\omega$ -3 PUFAs regulates the differentiation of Th cells through its diverse metabolic production, related to Figure 3.** Intracellular staining of Th1, Th2, Th17 and Treg cells of splenocytes in 10-wk-old non-diabetic NOD mice cultured under PMA and ionomycin stimulation in the presence of distinctive PUFAs metabolites added at the time of activation for 24 h. Representative flow cytometry images with numbers in quadrants indicating percent IFN- $\gamma$ <sup>+</sup>, IL-4<sup>+</sup>, IL-7<sup>+</sup> and CD25<sup>+</sup> FoxP3<sup>+</sup> of Th cells (top right). Data shown are gated on CD4<sup>+</sup> T-cells(CD3<sup>+</sup>CD8<sup>-</sup>).

## Supplemental Figure 8

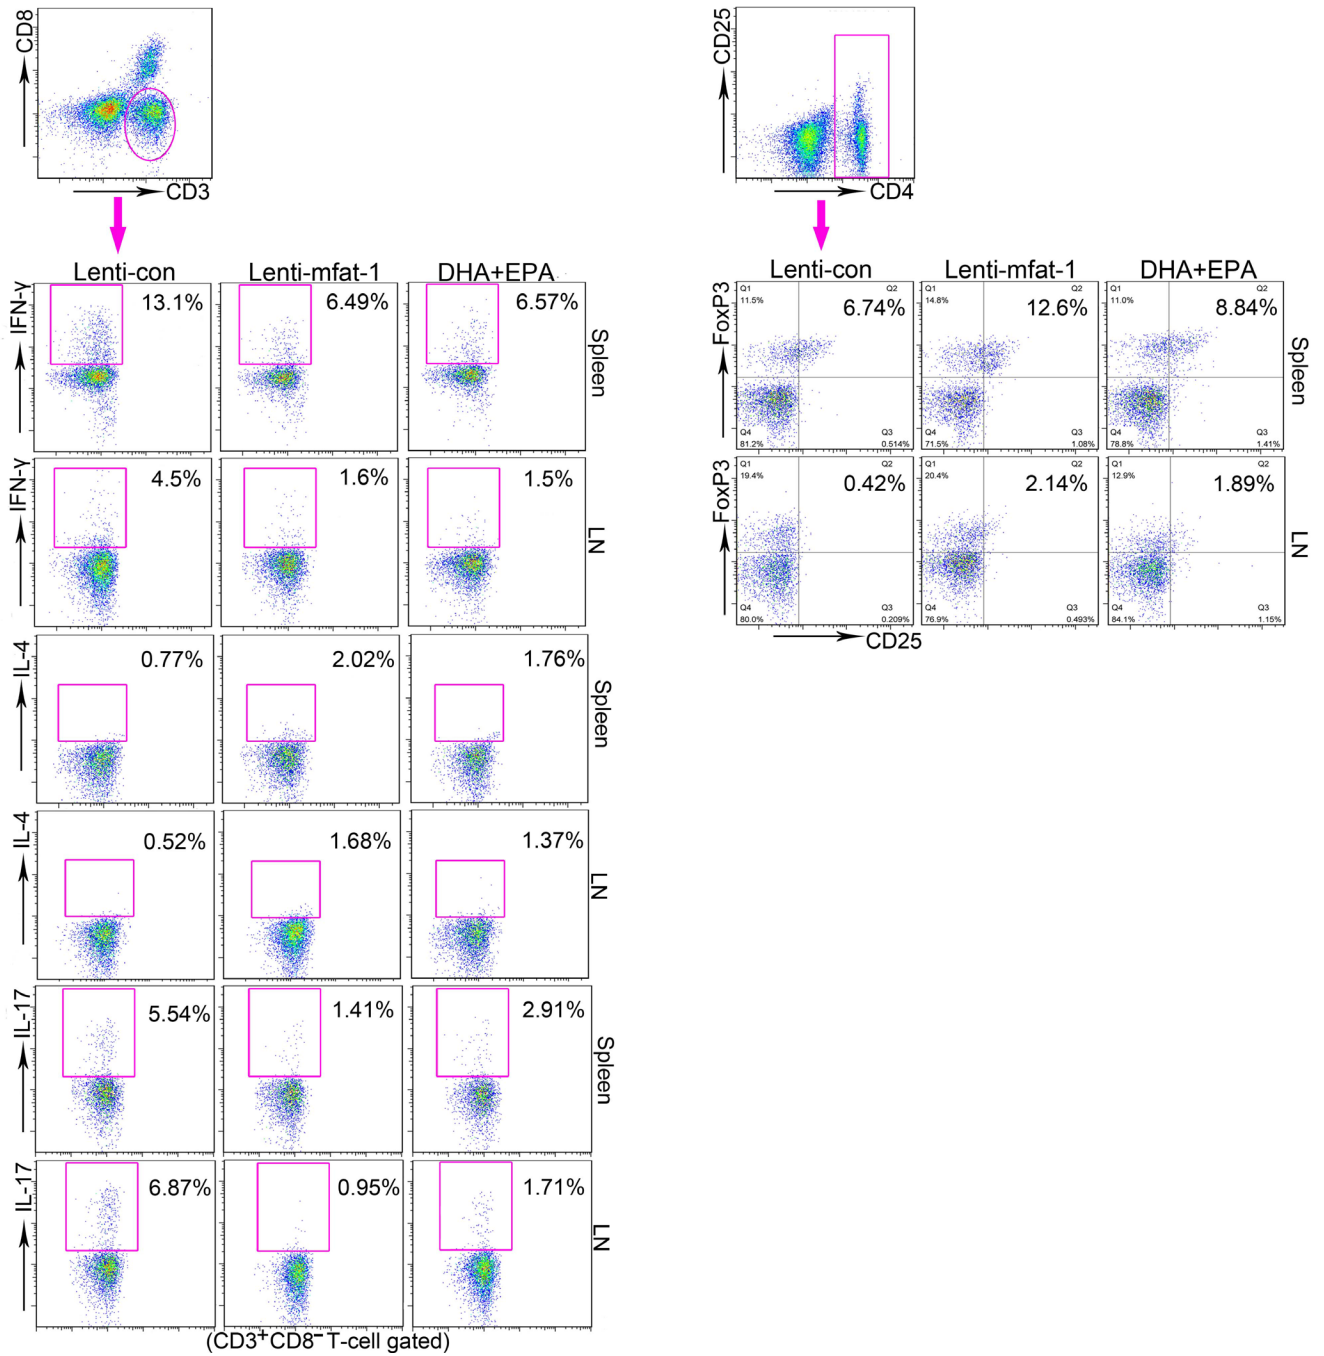

**Supplemental Figure 8. Therapeutic  $\omega$ -3 PUFAs improved Th cell differentiation in diabetic NOD mice, related to Figure 9.** Intracellular staining of Th1, Th2, Th17 and Treg cells in spleen and lymph node (LN) of diabetic NOD mice treated with lenti-con, lenti-mfat-1 and fed on DHA+EPA diet. Mice were sacrificed and spleen and lymph node harvested at 9 weeks following lentivirus treatment and DHA+EPA dietary intervention. Representative flow cytometry images with numbers in quadrants indicating percent IFN- $\gamma$ <sup>+</sup>, IL-4<sup>+</sup>, IL-7<sup>+</sup> and CD25<sup>+</sup> FoxP3<sup>+</sup> of Th cells (top right). Data shown are gated on CD4<sup>+</sup> T-cells (CD3<sup>+</sup>CD8<sup>-</sup>).

## Supplemental Figure 9

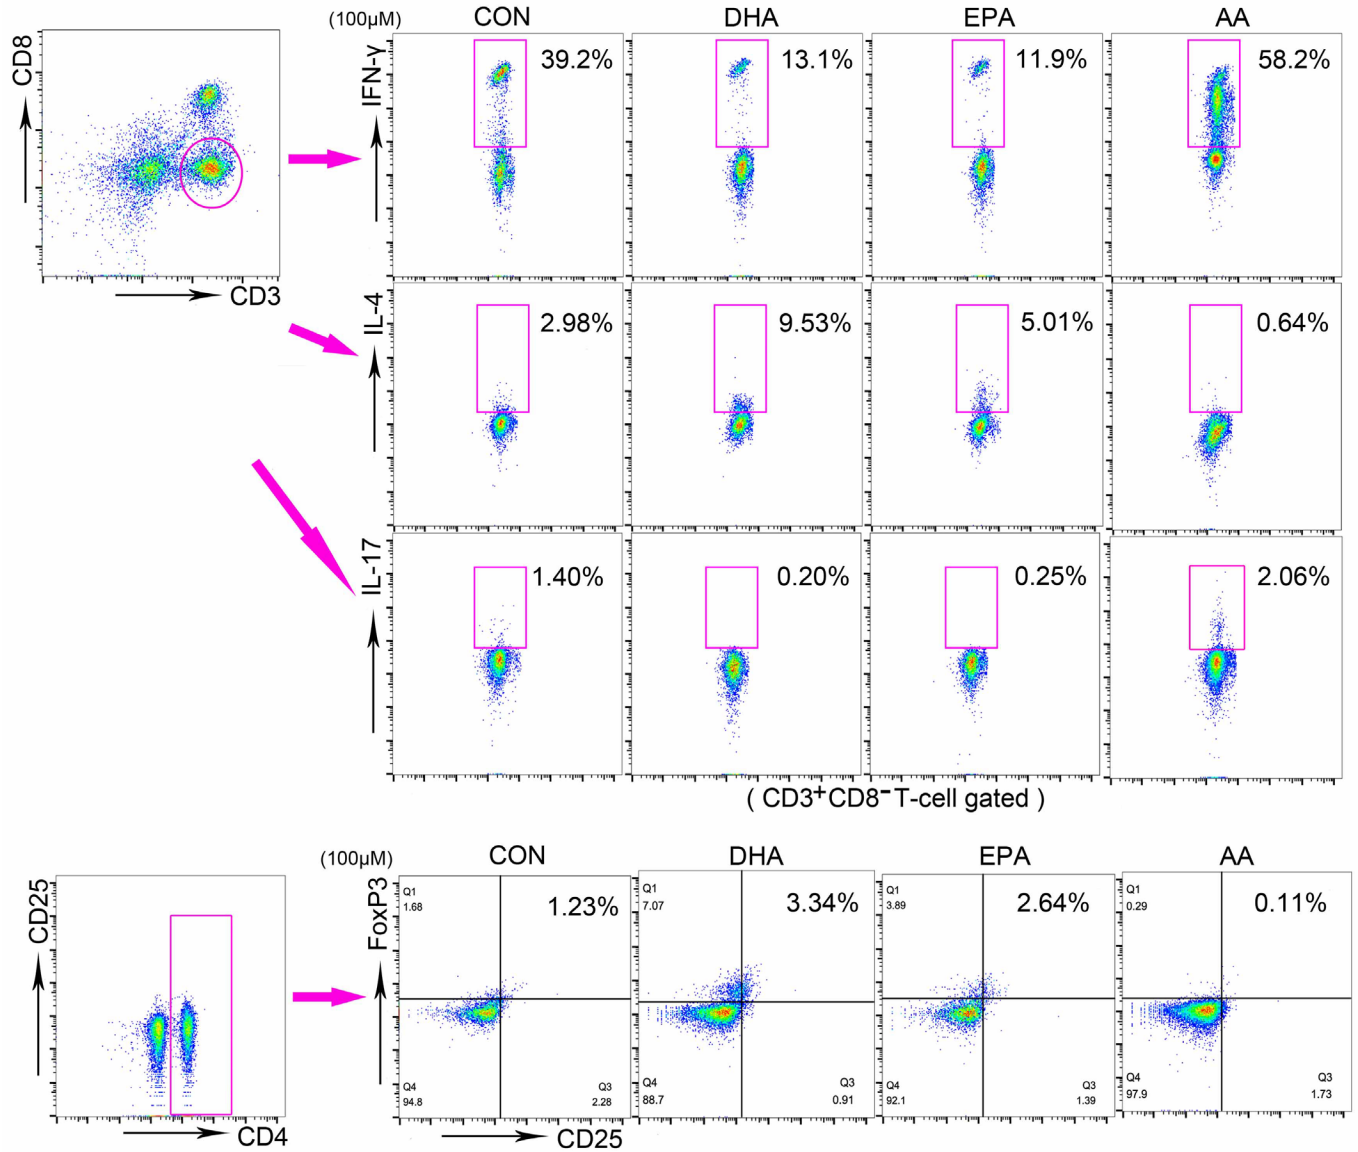

**Supplemental Figure 9.  $\omega$ -3 and  $\omega$ -6 PUFAs changed Th cells polarization of PBMCs from T1D patients *in vitro*, related to Figure 10.** Intracellular staining of Th1, Th2, Th17 and Treg cells of PBMCs from T1D patients cultured under PMA and ionomycin stimulation in the presence of DHA, EPA and AA(100 $\mu$ M) added at the time of activation for 24 h. Representative flow cytometry images with numbers in quadrants indicating percent IFN- $\gamma$ <sup>+</sup>, IL-4<sup>+</sup>, IL-7<sup>+</sup> and CD25<sup>+</sup> FoxP3<sup>+</sup> of Th cells (top right). Data shown are gated on CD4<sup>+</sup> T-cells(CD3<sup>+</sup>CD8<sup>-</sup>).

## Supplemental Figure 10

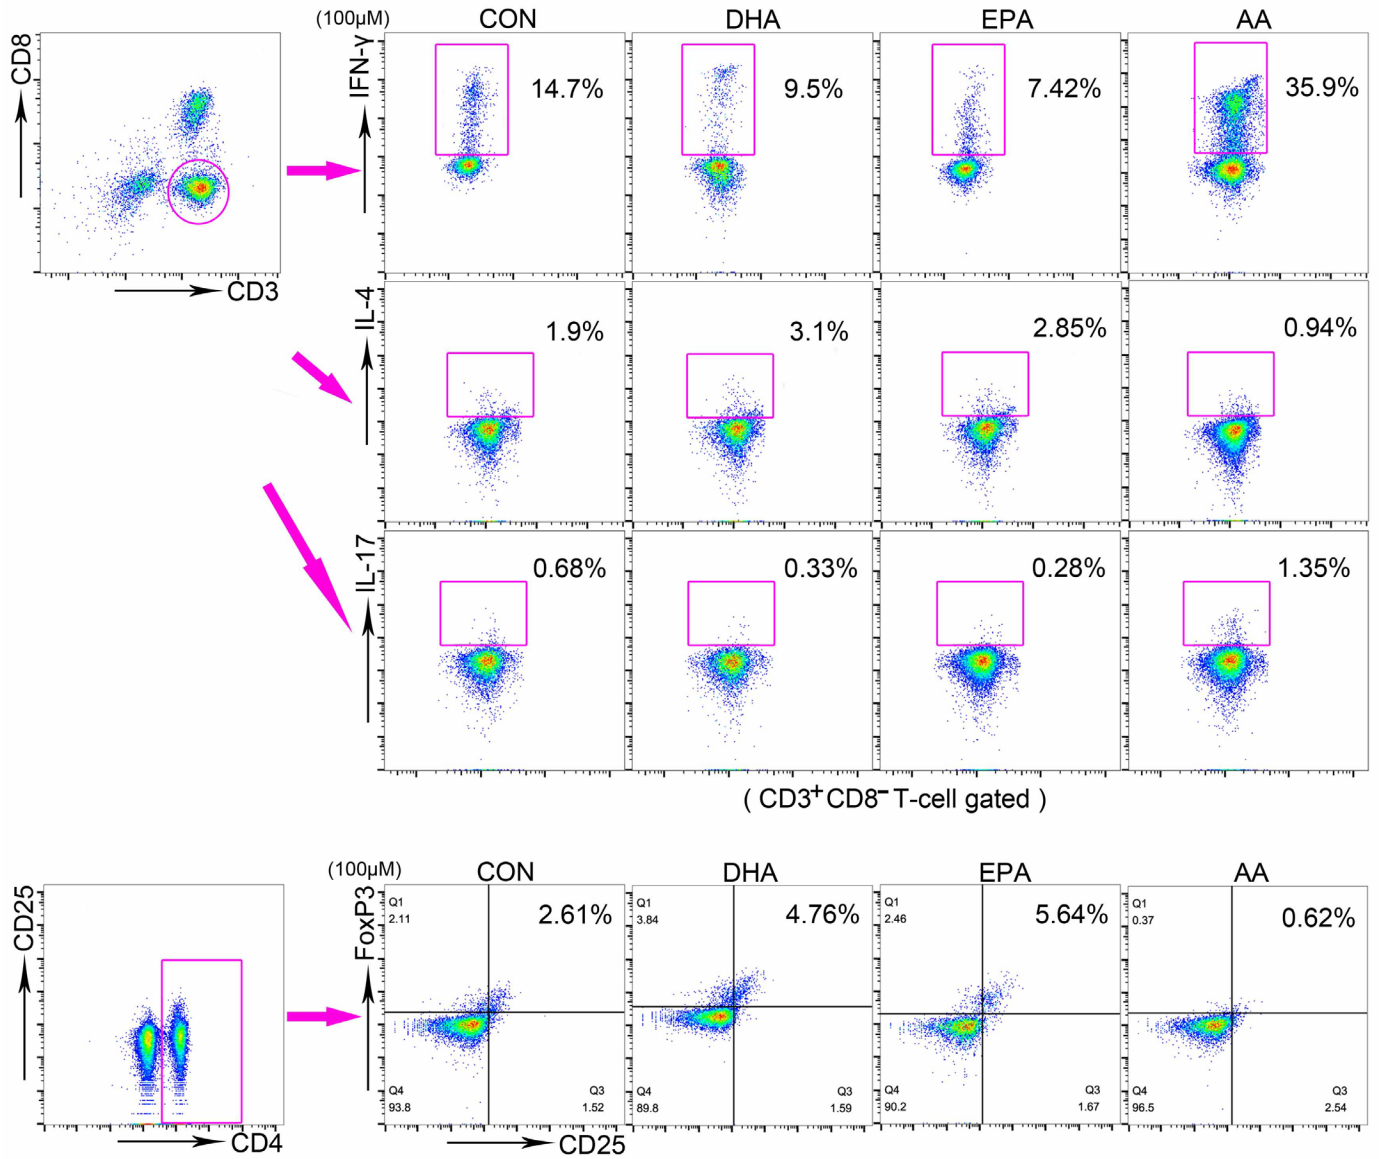

**Supplemental Figure 10. Modulation of Th cells by  $\omega$ -3 and  $\omega$ -6 PUFAs in PBMCs from non-diabetic donors *in vitro*, related to Figure 10.** Intracellular staining of Th1, Th2, Th17 and Treg cells of PBMCs from healthy donors cultured under PMA and ionomycin stimulation in the presence of DHA, EPA and AA(100 $\mu$ M) added at the time of activation for 24 h. Representative flow cytometry images with numbers in quadrants indicating percent IFN- $\gamma$ <sup>+</sup>, IL-4<sup>+</sup>, IL-7<sup>+</sup> and CD25<sup>+</sup> FoxP3<sup>+</sup> of Th cells (top right). Data shown are gated on CD4<sup>+</sup> T-cells(CD3<sup>+</sup>CD8<sup>-</sup>).

## Supplemental Figure 11

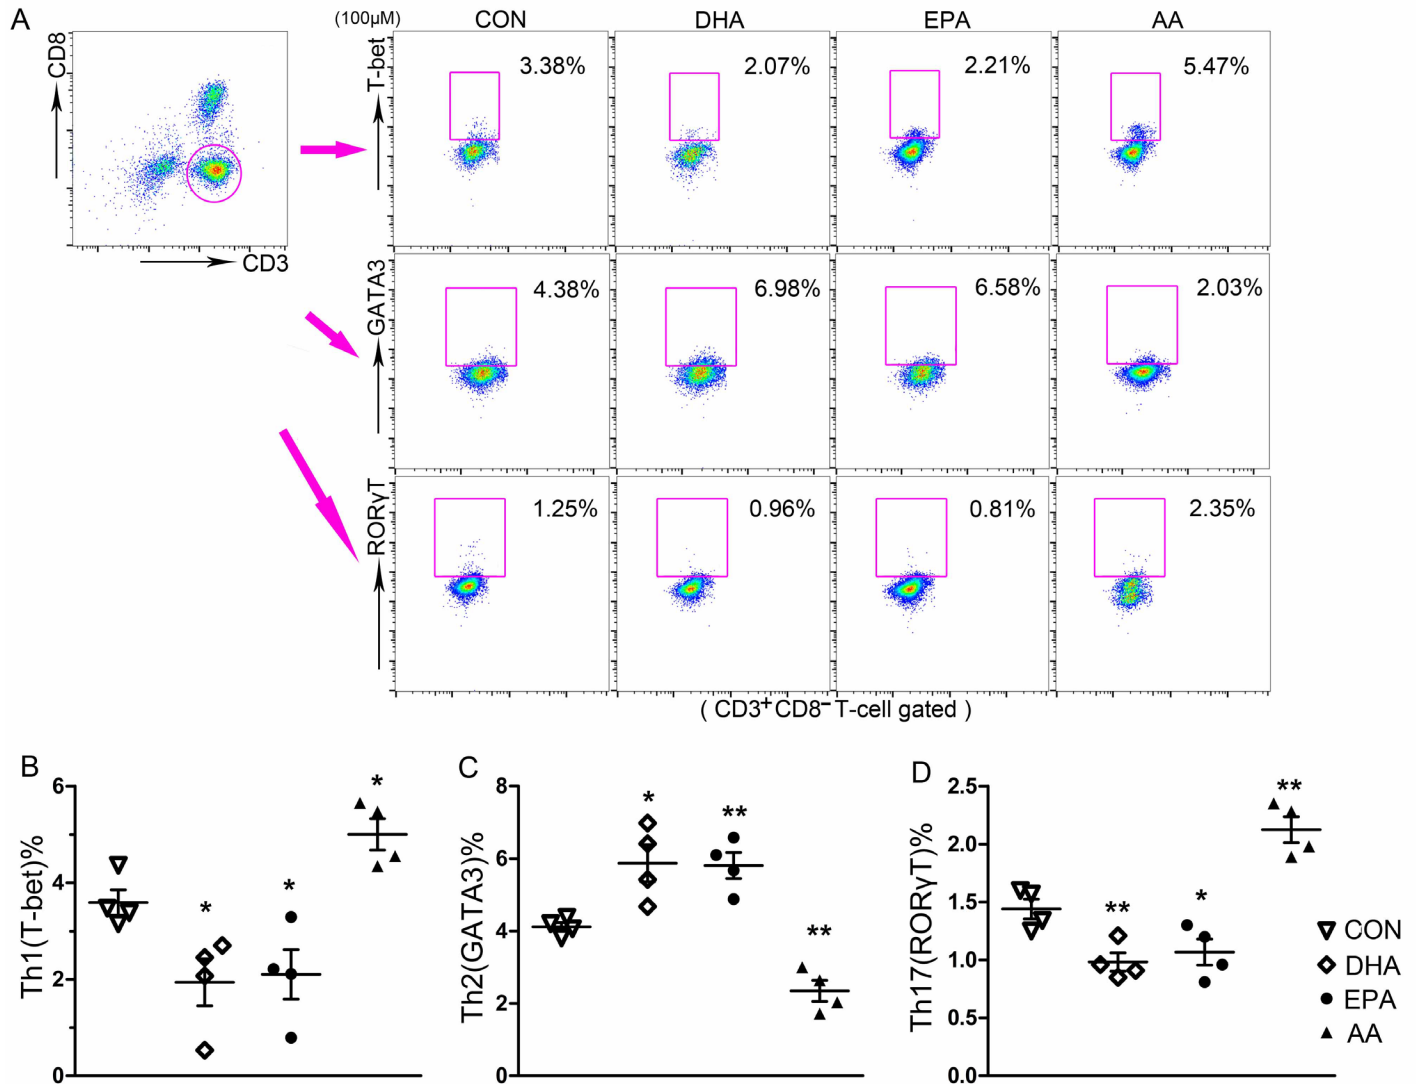

**Supplemental Figure 11. Expression of transcription factors of Th cells modulated by  $\omega$ -3 and  $\omega$ -6 PUFAs in PBMCs from non-diabetic donors *in vitro*.** Representative flow cytometry images(A) and the quantification (B-D) of T-bet-, GATA3- and ROR $\gamma$ T- staining Th cells of PBMCs from non-diabetic donors cultured in the presence of PMA and ionomycin as well as DHA, EPA and AA(100 $\mu$ M) for 24 h(n = 4 per group). Data shown are gated on CD4<sup>+</sup> T-cells(CD3<sup>+</sup>CD8<sup>-</sup>). \*, P < 0.05; \*\*, P < 0.01 when compared to control group. Values are means  $\pm$  SEM.(Student *t* tests).

**Supplemental Table 1.** Distribution of  $\omega$ -3 and  $\omega$ -6 PUFA Species in Diets.

| (%)                            | CON Diet         | DHA+EPA Diet        | AA Diet             |
|--------------------------------|------------------|---------------------|---------------------|
| $\omega$ -3 PUFA species       |                  |                     |                     |
| C18:3 ( $\alpha$ -LA)          | 1.83 $\pm$ 0.09  | 0.78 $\pm$ 0.004*** | 0.81 $\pm$ 0.004*** |
| C20:5 (EPA)                    | 1.17 $\pm$ 0.03  | 29.86 $\pm$ 0.15*** | 0.03 $\pm$ 0.001*** |
| C22:5 (DPA)                    | 0.21 $\pm$ 0.02  | 3.40 $\pm$ 0.01***  | 0.11 $\pm$ 0.001*   |
| C22:6 (DHA)                    | 1.96 $\pm$ 0.07  | 23.00 $\pm$ 0.06*** | 0.87 $\pm$ 0.01***  |
| $\omega$ -6 PUFA species       |                  |                     |                     |
| C18:2                          | 29.93 $\pm$ 1.44 | 8.68 $\pm$ 0.02***  | 20.87 $\pm$ 0.13*   |
| C18:3 ( $\gamma$ -LA)          | 0.07 $\pm$ 0.01  | 0.36 $\pm$ 0.03*    | 2.22 $\pm$ 0.01***  |
| C20:4 (AA)                     | 0.56 $\pm$ 0.03  | 3.62 $\pm$ 0.01***  | 31.92 $\pm$ 0.13*** |
| C22:4                          | 0.12 $\pm$ 0.001 | 0.18 $\pm$ 0.05***  | 0.29 $\pm$ 0.001*** |
| $\omega$ -6/ $\omega$ -3 ratio | 5.94 $\pm$ 0.28  | 0.23 $\pm$ 0.002*** | 30.49 $\pm$ 0.24*** |

The compositions of  $\omega$ -3 or  $\omega$ -6 PUFAs were expressed using relative percentages, i.e., the distribution areas of  $\omega$ -3 or  $\omega$ -6 PUFAs peaks divided by the total peak areas of all detectable saturated and unsaturated free fatty acids (from the same sample) resolved from the gas chromatography column. Data were means  $\pm$  SD; n=3. \*, P < 0.05; \*\*, P < 0.01; \*\*\*, P < 0.0001 when compared with the control diet group. AA: Arachidonic acid; ALA:  $\alpha$ -lipoic acid; DHA: Docosahexaenoic acid; DPA: docosapentaenoic acid; EPA: Eicosapentaenoic acid; LA: linoleic acid.

**Supplemental Table 2.** Analysis of  $\omega$ -3 and  $\omega$ -6 PUFA Species in the Whole Blood Samples of NOD Mice with Dietary Intervention

| (%)                            | CON Diet         | DHA+EPA Diet        | AA Diet             |
|--------------------------------|------------------|---------------------|---------------------|
| $\omega$ -3 PUFA species       |                  |                     |                     |
| C18:3 ( $\alpha$ -LA)          | 0.16 $\pm$ 0.03  | 0.07 $\pm$ 0.06     | NP                  |
| C20:5 (EPA)                    | 0.70 $\pm$ 0.07  | 6.54 $\pm$ 0.57***  | 0.03 $\pm$ 0.04     |
| C22:5                          | 0.66 $\pm$ 0.08  | 1.82 $\pm$ 0.12***  | 0.29 $\pm$ 0.02***  |
| C22:6 (DHA)                    | 6.73 $\pm$ 0.62  | 11.18 $\pm$ 0.62*** | 3.52 $\pm$ 0.26***  |
| $\omega$ -6 PUFA species       |                  |                     |                     |
| C18:2                          | 16.97 $\pm$ 0.42 | 9.59 $\pm$ 1.26***  | 3.52 $\pm$ 0.61***  |
| C18:3 ( $\gamma$ -LA)          | 0.2 $\pm$ 0.01   | 0.16 $\pm$ 0.03     | 0.32 $\pm$ 0.07*    |
| C20:4 (AA)                     | 13.29 $\pm$ 1.16 | 10.14 $\pm$ 1.41    | 36.94 $\pm$ 2.34*** |
| C22:4                          | 0.86 $\pm$ 0.10  | 0.29 $\pm$ 0.05***  | 2.55 $\pm$ 0.08***  |
| $\omega$ -6/ $\omega$ -3 ratio | 3.82 $\pm$ 0.40  | 1.03 $\pm$ 0.11***  | 11.32 $\pm$ 0.26*** |

Compositions of  $\omega$ -3 or  $\omega$ -6 PUFAs were expressed using the relative distribution area of the peaks in a given run of a gas chromatography assay. Data were means  $\pm$  SD; n=3. \*, P < 0.05; \*\*, P < 0.01; \*\*\*, P < 0.0001 when compared with the control diet group. AA: Arachidonic acid; ALA:  $\alpha$ -lipoic acid; DHA: Docosahexaenoic acid; DPA: docosapentaenoic acid; EPA: Eicosapentaenoic acid; LA: linoleic acid; NP: no peak.



**Supplemental Table 3.** Analysis of  $\omega$ -3 and  $\omega$ -6 PUFA Species in the Tail Samples of NOD Mice with Dietary Intervention

| (%)                            | CON Diet         | DHA+EPA Diet       | AA Diet             |
|--------------------------------|------------------|--------------------|---------------------|
| $\omega$ -3 PUFA species       |                  |                    |                     |
| C18:3 ( $\alpha$ -LA)          | 0.22 $\pm$ 0.08  | 0.32 $\pm$ 0.06    | 0.20 $\pm$ 0.01     |
| C20:5 (EPA)                    | NP               | 1.37 $\pm$ 0.27*** | NP                  |
| C22:5                          | 0.10             | 1.00 $\pm$ 0.03*** | NP                  |
| C22:6 (DHA)                    | 1.78 $\pm$ 0.31  | 3.67 $\pm$ 0.45*** | 0.68 $\pm$ 0.03**   |
| $\omega$ -6 PUFA species       |                  |                    |                     |
| C18:2                          | 14.10 $\pm$ 1.99 | 11.86 $\pm$ 2.76   | 11.03 $\pm$ 0.59    |
| C18:3 ( $\gamma$ -LA)          | NP               | 0.18 $\pm$ 0.11    | 1.06 $\pm$ 0.13***  |
| C20:4 (AA)                     | 5.57 $\pm$ 0.38  | 4.71 $\pm$ 1.121   | 19.96 $\pm$ 1.59*** |
| C22:4                          | 0.65 $\pm$ 0.09  | 0.06               | 1.27 $\pm$ 0.12*    |
| $\omega$ -6/ $\omega$ -3 ratio | 9.93 $\pm$ 2.41  | 2.64 $\pm$ 0.20**  | 37.75 $\pm$ 1.78*** |

Each species of  $\omega$ -3 and  $\omega$ -6 PUFAs were expressed using relative percentages, ie, the distribution areas of  $\omega$ -3 or  $\omega$ -6 PUFA peaks divided by the total peak areas of all detectable saturated and unsaturated resolved from the gas chromatography column. Data presented were means  $\pm$  SD; n=3. \*, P< 0.05; \*\*, P< 0.01; \*\*\*, P < 0.0001 when compared with the control diet group. AA: Arachidonic acid; ALA:  $\alpha$ -lipoic acid; DHA: Docosahexaenoic acid; DPA: docosapentaenoic acid; EPA: Eicosapentaenoic acid; LA: linoleic acid; NP: no peak.

**Supplemental Table 4.** Analysis of Cytokines Secretion in Blood Serum of Non-diabetic NOD Mice with Dietary Intervention

| (pg/ml)       | CON              | DHA+EPA            | AA                 |
|---------------|------------------|--------------------|--------------------|
| IFN- $\gamma$ | 0.78 $\pm$ 0.19  | 0.19 $\pm$ 0.05*   | 21.98 $\pm$ 10.34* |
| IL-4          | 0.53 $\pm$ 0.23  | 18.46 $\pm$ 6.33*  | 0.35 $\pm$ 0.19    |
| IL-17A        | 0.60 $\pm$ 0.12  | 0.84 $\pm$ 0.59    | 15.90 $\pm$ 6.51*  |
| IL-10         | 0.96 $\pm$ 0.21  | 27.81 $\pm$ 11.12* | 0.89 $\pm$ 0.12    |
| IL-6          | 10.82 $\pm$ 5.16 | 1.29 $\pm$ 0.40*   | 50.38 $\pm$ 9.56** |
| TNF- $\alpha$ | 2.73 $\pm$ 0.20  | 1.16 $\pm$ 0.24    | 26.47 $\pm$ 8.77*  |

Cytokines secretion in blood serum of 20-wk-old non-diabetic NOD mice fed on control, DHA+EPA and AA diets. Data presented were means  $\pm$  SEM; n=7. \*, P< 0.05; \*\*, P< 0.01 when compared with the control group.

**Supplemental Table 5.** Analysis of Cytokines Induced in NOD Splenocytes Activated with DHA , EPA and AA in Serum-containing Medium.

| (pg/ml)       | CON                | DHA                | EPA                 | AA                  |
|---------------|--------------------|--------------------|---------------------|---------------------|
| IFN- $\gamma$ | 123 $\pm$ 2.47     | 88.16 $\pm$ 3.91*  | 144.97 $\pm$ 22.86  | 153.79 $\pm$ 9.67*  |
| IL-4          | 18.65 $\pm$ 0.19   | 17.50 $\pm$ 1.35   | 22.61 $\pm$ 0.75*   | 11.95 $\pm$ 0.24*   |
| IL-17A        | 122.13 $\pm$ 4.94  | 92.81 $\pm$ 1.89*  | 102.71 $\pm$ 23.09  | 227.28 $\pm$ 1.15*  |
| IL-10         | 105.37 $\pm$ 10.02 | 147.47 $\pm$ 7.35* | 178.44 $\pm$ 3.54** | 87.88 $\pm$ 8.77*   |
| IL-6          | 122.07 $\pm$ 13.57 | 98.17 $\pm$ 20.32  | 125.60 $\pm$ 1.22   | 211.28 $\pm$ 13.62* |

Cytokines induced in 10-wk-old non-diabetic NOD splenocytes ( $10^7$  cells) with PMA and ionomycin plus 50 $\mu$ M of DHA, EPA and AA in serum-containing medium. Data presented were means  $\pm$  SEM; n=3. \*, P< 0.05; \*\*, P< 0.01 when compared with the control group.

**Supplemental Table 6.** Analysis of  $\omega$ -3 and  $\omega$ -6 PUFA Species in the Whole Blood Samples of Diabetic NOD Mice in  $\omega$ -3 PUFAs Treatment.

| (%)                            | Lenti-con       | Lenti-mfat-1     | DHA+EPA            |
|--------------------------------|-----------------|------------------|--------------------|
| $\omega$ -3 PUFA species       |                 |                  |                    |
| C18:3 ( $\alpha$ -LA)          | 0.34 $\pm$ 0.12 | 0.36 $\pm$ 0.48  | 0.08 $\pm$ 0.07*   |
| C20:5 (EPA)                    | 0.53 $\pm$ 0.09 | 5.75 $\pm$ 2.96* | 10.5 $\pm$ 1.41**  |
| C22:5                          | 0.59 $\pm$ 0.04 | 1.82 $\pm$ 1.73  | 2.18 $\pm$ 0.56**  |
| C22:6 (DHA)                    | 6.26 $\pm$ 1.05 | 7.82 $\pm$ 5.22  | 13.5 $\pm$ 3.18*   |
| $\omega$ -6 PUFA species       |                 |                  |                    |
| C18:2                          | 19.5 $\pm$ 1.67 | 16.7 $\pm$ 18.3  | 11.2 $\pm$ 0.52**  |
| C18:3 ( $\gamma$ -LA)          | NP              | NP               | NP                 |
| C20:4 (AA)                     | 12.2 $\pm$ 3.18 | 8.01 $\pm$ 4.02  | 10.8 $\pm$ 1.66    |
| C22:4                          | 0.94 $\pm$ 0.19 | NP               | NP                 |
| $\omega$ -6/ $\omega$ -3 ratio | 4.24 $\pm$ 0.31 | 1.77 $\pm$ 1.71  | 0.84 $\pm$ 0.08*** |

Each species of  $\omega$ -3 and  $\omega$ -6 PUFAs were expressed using relative percentages, ie, the distribution areas of  $\omega$ -3 or  $\omega$ -6 PUFA peaks divided by the total peak areas of all detectable saturated and unsaturated resolved from the gas chromatography column. Data presented were means  $\pm$  SD; n=3. \*, P< 0.05; \*\*, P< 0.01; \*\*\*, P < 0.0001 when compared with the control diet group. AA: Arachidonic acid; ALA:  $\alpha$ -lipoic acid; DHA: Docosahexaenoic acid; DPA: docosapentaenoic acid; EPA: Eicosapentaenoic acid; LA: linoleic acid; NP: no peak.

**Supplemental Table 7.** Characterization of T1D patients and non-diabetic donors

| Case number                             | Age (years) | Sex | A1C    | ICA | IAA | GAD-Ab | IA2A |
|-----------------------------------------|-------------|-----|--------|-----|-----|--------|------|
| Type 1 diabetic patients ( <i>n</i> =4) |             |     |        |     |     |        |      |
| P01                                     | 19          | F   | 9.60%  | —   | —   | +      | —    |
| P02                                     | 11          | M   | 11.90% | —   | —   | +      | +    |
| P03                                     | 25          | F   | 9.80%  | +   | —   | +      | +    |
| P04                                     | 10          | F   | 12.0%  | +   | —   | +      | —    |
| Non-diabetic donors ( <i>n</i> =5)      |             |     |        |     |     |        |      |
| C01                                     | 24          | F   | /      | —   | —   | —      | —    |
| C02                                     | 28          | M   | /      | —   | —   | —      | —    |
| C03                                     | 26          | F   | /      | —   | —   | —      | —    |
| C04                                     | 27          | F   | /      | —   | —   | —      | —    |
| C05                                     | 34          | M   | /      | —   | —   | —      | —    |

F, Female; M, Male; A1C, Glycated hemoglobin; ICA, Islet cell antibody; IAA, Autoantibodies against insulin; GAD-Ab, Glutamic acid decarboxylase antibody; IA2A, Protein tyrosine phosphatase antibody.

**Supplemental Table 8.** Distribution of Fatty Acid Species in Fish Oil and DHA+EPA Diets.

| (mg/kg)                  | Fish oil  | DHA+EPA Diet |
|--------------------------|-----------|--------------|
| Vitamin D3               | NP        | 1.03         |
| C14 (Myristic acid)      | 260.3     | 273.68       |
| C15                      | 10.71     | 28.48        |
| C16 (Palmitic acid)      | 1182.01   | 10125.09     |
| C16:1 (Palmitoleic Acid) | 1090.31   | 643.41       |
| C17                      | 26.7      | 114.76       |
| C18 (Stearic acid)       | 2616.58   | 3758.69      |
| C20 (Arachidic acid)     | 1019.7    | 275.39       |
| C20:1                    | 2967.77   | 504.32       |
| C21                      | 160.58    | 30.42        |
| C22 (Docosanoic acid)    | 411       | 167.81       |
| C22:2                    | 602.69    | NP           |
| C23                      | 72.76     | 30.72        |
| C24                      | 101.3     | 97.71        |
| $\omega$ -9 PUFA species |           |              |
| C18:1 (Oleic acid)       | 5412.26   | 14612.32     |
| C22:1 (Erucic acid)      | 7272.63   | 453.91       |
| $\omega$ -3 PUFA species |           |              |
| C18:3 ( $\alpha$ -LA)    | NP        | NP           |
| C20:3                    | 35897.21  | 5247.04      |
| C20:5 (EPA)              | 448607.21 | 70974.90     |
| C22:6 (DHA)              | 394590.06 | 154902.34    |
| $\omega$ -6 PUFA species |           |              |
| C18:2                    | 2010.77   | 41255.36     |
| C18:3 ( $\gamma$ -LA)    | 199.53    | NP           |
| C20:4 (AA)               | 42977.95  | 5643.95      |

Vitamin D3 was tested according to standard procedure of determination of vitamin D3 in feed-High-performance liquid chromatography of China(GB/T17818-2010). The compositions of fatty acids were detected by GC-MS(gas chromatography-mass spectrometry). AA: Arachidonic acid; ALA:  $\alpha$ -lipoic acid; DHA: Docosahexaenoic acid; DPA: docosapentaenoic acid; EPA: Eicosapentaenoic acid; LA: linoleic acid; NP: No peak. The detection limit was 0.10 mg/kg.

**Supplemental Table 9.** Compositions of Natural-Ingredient Diet used for SPF Mouse Breeding Colonies

| Basic Diet,g/kg diet                       | Conventional |
|--------------------------------------------|--------------|
| Fish meal(60% protein)                     | 100          |
| Soybean meal(48% protein)                  | 170          |
| Alfalfa meal,dehydrated(17% protein)       | 40           |
| Corn gluten meal(60% protein)              | 30           |
| Ground corn                                | 245          |
| Ground wheat                               | 230          |
| Wheat middlings                            | 100          |
| Dried yeast                                | 20           |
| Maltose                                    | 15           |
| Soybean oil                                | 25           |
| Salt                                       | 5            |
| Dicalcium phosphate                        | 12.5         |
| Ground limestone                           | 5            |
| Mineral premix                             | 1.2          |
| Vitamin premix                             | 1.3          |
| Mineral premix,mg/kg diet                  |              |
| Cobalt(as cobalt carbonate)                | 0.44         |
| Copper(as copper sulfate)                  | 4.4          |
| Iron(as iron sulfate)                      | 132.3        |
| Manganese(as manganous oxide)              | 66.2         |
| Zinc(as zinc oxide)                        | 17.6         |
| Iodine(as calcium iodate)                  | 1.54         |
| Vitamin premix,per kg diet                 |              |
| Stabilized vitamin A palmitate or stearate | 6060IU       |
| Vitamin D3(D-activated animal sterol)      | 5040IU       |
| Vitamin K(menadione activity)              | 3.09mg       |
| Vitamin E                                  | 22.1mg       |
| Choline chloride                           | 617mg        |
| Folic acid                                 | 5.44mg       |
| Niacin                                     | 116.7mg      |
| Ca-d-pantothenate                          | 19.8mg       |
| Vitamin B6                                 | 1.87mg       |
| Riboflavin supplement                      | 3.75mg       |
| Thiamin monomitate                         | 11mg         |
| D-Biotin                                   | 0.15mg       |
| Vitamin B12 supplement                     | 0.004mg      |

Amounts listed for mineral and vitamin premixes represent the mass or IU of the specific mineral element or vitamin rather than added compounds.

**Supplemental Table 10.** Real-time RT-PCR primers used for mRNA expression analysis.

| Gene           | Forward               | Reverse              |
|----------------|-----------------------|----------------------|
| Pdx1           | TGAAATCCACCAAAGCTCAC  | TAGGCAGTACGGGTCCTCTT |
| Arx            | CCACG TTCACCAGTTACCAG | TCAGGGTAGTGCGTCTTCTG |
| Pax4           | TCCCAGGCCTATCTCCAAC   | TATGAGGAGGAAGCCACAGG |
| $\beta$ -actin | GCTCTGGCTCCTAGCACCAT  | GGGCCGGACTCATCGTACT  |
